# Supplementary material for: Using life cycle sustainability assessment to trade off sourcing strategies for humanitarian relief items
Source: Springer Nature journal article supplement (doi:10.1007/s11367-016-1245-z), 2016-12-17
Supplement: MOESM1 [file 11939184]

SUPPLEMENT 1. DATA INTERNATIONAL SOURCING SCENARIO

**Section 1. Environmental LCA International Sourcing Scenario**

**Inventory Data**

Table 1 presents general product data concerning weight and volume of the kitchen set.

| **Component** | **Material** | **Weight** | **Volume** |
| --- | --- | --- | --- |
| Kitchen set | Mainly Stainless Steel | Net weight 1kg/set |  |
| Packaging | Double corrugated, export quality cardboard | Gross weight per export carton with 4 sets: 4.7 kg. | 0.022 m3  (0.3 x 0.3 x 0.25m.) |
| Seal | Plastic 10 mm straps | - |  |

**Table 1 – Weight and volume of kitchen set International Sourcing (Source: UNHCR)**

**Impact Assessment**

Using the ReCiPe method (See Supplement 3), we analyzed the inventory data in order to determine the impacts of international sourcing (production and transportation) on the environment (impact assessment). The figures below present the results of the enviornmental impact assessment. These impact categories are described in Section 4 of the paper. The impact categories are shown in Table 2. The background calculations can be found in Supplement 3 (Excelsheet E-LCA).

| **Midpoint Impact category** | **Endpoint Impact category** |
| --- | --- |
| Climate change (CC)  Ozone depletion (OZ)  Terrestrial acidification (TA)  Freshwater eutrophication (FE)  Marine eutrophication (ME)  Human toxicity (HT)  Photochemical oxidant formation (POF)  Particulate matter formation (PMF)  Terrestrial ecotoxicity (TET)  Freshwater ecotoxicity (FET)  Marine ecotoxicity (MET)  Ionising radiation (IR)  Agricultural land occupation (ALO)  Urban land occupation (ULO)  Natural land transformation (NLT)  Water depletion (WD)  Mineral resource depletion (MRD)  Fossil fuel depletion (FD) | Damage to Human Health (HH)  Damage to Ecosystem Diversity (ED)  Damage to Resource Availability (RA) |

**Table 2 – Environmental Impact Categories (Goedkoop et al., 2013)**

Figure 1 shows the environmental endpoint impacts of the international sourcing strategy.

**Figure 1- Environmental Endpoint Impacts of International Sourcing (based on emissions according to ReCiPe).**

Figure 2 shows how production and transportation phases contribute to environmental endpoint impacts in the case of international sourcing. We observe that the production phase is responsible for more than 96% of impacts both on human health and on ecosystems.

**Figure 2- The relative impact of Production and Transportation phase on Endpoint Impacts, International Sourcing**

Figure 3 shows the breakdown of environmental midpoint impacts for production and transportation of the international sourcing strategy. The main impact here is clearly climate change. The relative impact on climate change of production and transportation (Figure 4) shows again the dominance of production.

**Figure 3 – Environmental Midpoint Impacts International Sourcing (based on emissions according to ReCiPe).**

**Figure 4 – The production and transportation relative impact on climate change (based on CO2 emissions according to ReCiPe) International Sourcing.**

# Section 2: Social LCA

Inventory Data
Data for the social life cycle assessment has been obtained via online (statistics) databases (amongst others databases of UNICEF and the International Labour Organization (ILO)), and additional company and government online resources. Indicators Social-LCA According to UNEP/SETAC (Ciroth & Franze, 2011)

**Stakeholder group Workers – production in India**

| **Subcategory** | **Indicator** | **Status** |
| --- | --- | --- |
| **Freedom of association and collective bargaining** | Evidence of restriction freedom of association and collective bargaining in country/ sector | India did not ratify the corresponding core conventions of the international labor organization C.87&C.98.[[1]](#footnote-1) Though in the Indian Industrial Disputes Act: worker representative committees are described who secure worker-employer relations[[2]](#footnote-2) |
| Presence of unions within the sector and description of their influence | Trade unions in the Indian steel sector are quite numerous as a result of the Trade Unions Act (1926). Though they suffer from a variety of problems such as financial instability and inter-union rivalry.[[3]](#footnote-3) Some sources indicate a presence of 240 trade unions in the Indian steel industry (Singh, 2008)[[4]](#footnote-4). Steel associations across India have gathered recently (august 2015) to protest against implementation of government plans as these would drive up prices. This was also supported by steel can manufacturers.[[5]](#footnote-5) |
| **Child labour** | Percentage of child labour in country/ sector | India did not ratify the core conventions concerning child labour C.138 and C.182 of ILO.[[6]](#footnote-6) Though India ratified the United Nations Convention on the Rights of the child. In India however, it is estimated that 14,4% of children aged 10-14 years are in the work force.[[7]](#footnote-7) At Kitchen Essentials a strict no child labour policy is enforced (Kessentials, 2015)[[8]](#footnote-8). |

| **Forced Labour** | Frequency of forced labour in country/ sector | India ratified the ILO conventions C.29 and 105 against forced labour.[[9]](#footnote-9) However forced labour is mostly reported in agriculture and textile production.[[10]](#footnote-10) Neither the steel manufacturing sector nor Kitchen Essentials is linked to forced labour (Kessentials, 2015). |
| --- | --- | --- |
| **Fair Salary** | Specification of living wage and minimum wage in the country | Average monthly wage in India amounts 215 US dollars (ILO, 2014).[[11]](#footnote-11) Minimum wage level is unclear as 1600 different rates are set by Central Government and different states for different industries. Compliance with minimum wages is low (ILO, 2014). Kitchen Essentials reports above sector average wages. |
| Wage level of the worker with lowest income and description of payment performance of the sector | Data not available |
| **Working hours** | Hours work per employee and month in average | Normal hours are limited to 9 hours per day or 48 hours in a week.[[12]](#footnote-12) No data is available on Kitchen Essentials specifically. |
| Number of days without work per week | Data not available |
| Description of how overtime is handled | Data not available |
| **Discrimination** | Percentage of women in the labour force in the sector | 25,8% (ILOStat)[[13]](#footnote-13) |
| Country gender index ranking | Rank 80 of 109 (Genderindex)[[14]](#footnote-14) |
| Occurrence of discrimination in the country/ sector | Women are less likely to hold wage jobs and they get paid less (ILO, 2014). Genderindex (2014) observes a high level of discrimination in India. At Kitchen Essentials gender and ethnic background are sometimes criteria for hiring. |
| Ratio of salary of women to wages of men in sector | 32,6% (ILOStat). |
| **Health and safety** | Description of potential main origins of danger | No data available. |
| Accident rate of the country/ sector | No sector data available. Kitchen Essentials reports no accidents. |
| **Social benefits/ Social security** | Social security expenditures of the country/ sector | 2,6% of GDP (2010) was spend on public social protection expenditures (ILOStat). |

**Stakeholder group Local community – production in India**

| **Subcategory** | **Indicator** | **Status** |
| --- | --- | --- |
| **Access to material resources** | Extraction of material sources and level industrial water use | India is the world 4th largest steel producer. For steel production iron, chrome, nickel and carbon are required.[[15]](#footnote-15) |
| Percent of population with access to improved sanitation facilities | 35,1% (Unicef, 2015) [[16]](#footnote-16) |
| Existence of projects to improve community infrastructure | The Ministry of Steel proposes in its report to improve infrastructures as mining activities and raw material transport rely heavily on the present inadequate infrastructure. The timespan of the plans covers 2012-2017.[[17]](#footnote-17) |
| Presence of certified environmental management systems | Kitchen Essentials reports to be ISO 14000 and ISO 14001 certified. |
| Description of (potential) material resource conflicts | In the Eastern part of India, where a lot of the mineral mines are situated Maoist militants extort money from mining companies (National Geographic, 2015).[[18]](#footnote-18) |
| **Access to immaterial resources** | Freedom of expression in country/ sector | India is marked as a partly free press country (Dunham, 2015).[[19]](#footnote-19) In lead up to the elections quite some cases of censored journalists were reported. As there are a lot of trade unions in the sector, it can be assumed that the sector respects freedom of expression. |
| Annual arrests connected to protest of sector actions | No information on sector-related arrests available. |
| Presence of community  education initiatives and  community service programmes | Some large steel producers have community service projects (Economic Times, 2014)[[20]](#footnote-20). However, no evidence can be found whether this is also the case in the steel pot manufacturing industry and at Kitchen Essentials specifically. |
| **Delocalisation**  **and migration** | Migration rate of the country | India has a slightly negative migration rate of -0,2 migrants/1000 inhabitants (IMO, 2015).[[21]](#footnote-21) |
| Number of individuals who  resettle that can be attributed  to the sector | India knows quite a lot of forced migration.[[22]](#footnote-22) However, this is not directly attributable to the steel pot manufacturing sector. |

| **Cultural heritage** | Respect of the sector regarding  local cultural heritage  including language,  social and religious practices. | Some large steel producers preserve and promote cultural heritage.[[23]](#footnote-23) Kitchen Essentials stated that it engages in structural projects to respect cultural heritage. |
| --- | --- | --- |
| **Respect of**  **Indigenous**  **rights** | Human rights issues faced  by indigenous people in the  country | India did not ratified the ILO convention C.169 on the protection of indigenous people. India has several laws which recognize indigenous peoples’ rights to land and self-governance. However, these have certain shortcomings.[[24]](#footnote-24) |
| Respect of the sector regarding  indigenous rights | The largest concentrations of indigenous peoples are found in the seven states of north-east India, and the so-called ‘central tribal belt’ stretching from Rajasthan to West Bengal. Neither the Kitchen Essentials plant nor the major iron ore mines are located in that area[[25]](#footnote-25), so it seems no indigenous communities are affected by steel pot manufacturing activities. |
| **Safe and**  **healthy living**  **conditions** | Burden of disease in the  Country | Life expectancy at birth amounts 66 years (WHO, 2013).[[26]](#footnote-26) Tuberculosis is one of the leading causes of mortality in India. The estimated incidence is the highest in the Northern provinces.[[27]](#footnote-27) |
| Pollution level of the country  and contribution of the  sector to the environmental  load | India is the world’s third largest polluter of greenhouse gas emissions. Furthermore, 13 out of world’s top twenty polluted cities is located in India. Industries rank third as contributors to Indian air pollution. [[28]](#footnote-28) Furthermore, steel making will emit 800 million tonne CO2 annually by 2030. Where total CO2 emission of India is around 1,8 billion tonnes today (Kanchan, 2013).[[29]](#footnote-29) |
| **Secure living conditions** | Crime rate | India ranks 67 of 120 compared to other countries. |
| Management policies related  to private security  personnel | No information available. |
| **Local Employment** | Percentage of unemployment  in the country | Unemployment rate (2014) amounts 4,9%. [[30]](#footnote-30) |
| Percentage of work force  hired locally | 80-100% of the workforce is hired locally at Kitchen Essentials |
| **Community Engagement** | Description of community  engagement in sector | No information available. |

**Stakeholder group Society – Production in India**

| **Public commitment to sustainable issues** | Presence of publicly available promises or agreements on sustainable issues  and complaints to the non-fulfilment of these commitments | No information available. |
| --- | --- | --- |
| Implementation/signing of  principles or codes of conducts | Signs of good work ethics are present, though those are not specified.[[31]](#footnote-31) Kitchen Essentials did not sign codes of conduct apart from agreements with the UNHCR. |
| **Contribution to economic development** | Economic situation of the country and relevance of the considered sector for  the economy | India has an GDP growth of 3,2%.[[32]](#footnote-32) India is developing in an open market economy. Especially the service sector is growing, amongst others because the well-educated English speaking population is growing. India is the worlds’ fourth largest steel producer and thus the sector is important for the Indian economy.[[33]](#footnote-33) No data available on the contribution of steel pot manufacturing sector. |
| **Prevention and**  **mitigation of**  **conflicts** | Presence of conflicts in the country | Over the past five decades conflicts have been reported in the North with Pakistan.[[34]](#footnote-34) In the eastern part Maoist militants terrorize mineral mining companies. Furthermore, in India a lot of religious conflicts occur.[[35]](#footnote-35) Lastly, land is one of India’s scarcest resources. Consequently land acquisition conflicts occur.[[36]](#footnote-36) |
| Risk of conflicts with regard to the sector and measures to reduce the risk | Land use conflicts are a risk for the mining sector. So it is an indirect risk for the steel pot manufacturing sector. |
| **Technology**  **Development** | Sector efforts in technology  development regarding eco friendliness | The Indian governments promotes R&D in the steel mining and manufacturing sector.[[37]](#footnote-37) However, no data available on R&D efforts in steel pot manufacturing. |
| Investments in technology  development | Kitchen Essentials reported to engage in above average investments in technology development compared to the sector. |
| **Corruption** | Risk of corruption in country  /sector | EY indicates that the metals and mining industry is one of the most vulnerable sectors for corruption.[[38]](#footnote-38) Manufacturing and retail and consumer goods is seen as least corrupt. India ranks 67 out of 149 in the world corruption ranking.[[39]](#footnote-39) |

Impact Assessment

An overview of the social impacts is displayed in Table 4. The performance assessment is listed in the PA column. The colours are assigned to the subcategories based on the inventory data (see above) and the rating scale (see Table 3). Subsequently it is distinguished if impacts on the impact categories (see Table 2) are rather high (+) or rather low (-), this is context dependent. Then the overall impact can be rated using the same rating scale (see Table 3. Lastly, the averages can be calculated. The rules of Ciroth and Franze (2011) were adopted for calculating the average scores. If at least one subcategory is assessed with a ‘6’, the amount cannot be higher than a ‘5’; if at least one subcategory is assessed with a ‘5’, the amount cannot be higher than a ‘4’. The resulting amount is the average of the calculated amounts of the stakeholder groups.

To illustrate the process, we describe the steps of the impact assessment for the stakeholder group workers and the subcategories ‘freedom of association’ and ‘discrimination’, using the inventory data . Concerning freedom of association we found that India did not ratify the corresponding conventions of the International Labor Organization (ILO). Despite this fact there are numerous trade unions. However these do not seem to be very effective (inventory data). Therefore the performance assessment results in score 3, indifferent effect. These conditions have a moderate impact on working conditions, health and safety, human rights and socio-economic repercussions. Therefore the impact assessment results in a slightly positive effect. Concerning discrimination in India, women have way less opportunities than men (inventory data). Therefore performance scores low (5~poor performance). All impact categories are affected highly, so impact assessment results in 6~very negative effect.

| Midpoint impact category | Abbreviation |
| --- | --- |
| Working conditions | WC |
| Health and Safety | HS |
| Human Rights | HR |
| Repercussions Socio-Economic | SER |
| Indigenous Rights/ Cultural Heritage | IR |
| Governance | G |

**Table 2 - Social impact categories (UNEP/SETAC, 2009)[[40]](#footnote-40)**

| Performance Assessment (PA) | Impact Assessment (IA) | Colour/factor |
| --- | --- | --- |
| Very good performance | Positive effect | 1 |
| Good performance | Lightly positive effect | 2 |
| Satisfactory performance | Indifferent effect | 3 |
| Inadequate performance | Lightly negative effect | 4 |
| Poor performance | Negative effect | 5 |
| Very poor performance | Very negative effect | 6 |

**Table 3- Rating scale of social impacts according to Ciroth & Franze (2011)**

| **Stakeholder groups** | **Subcategories** | **PA** | *WC* | *HS* | *HR* | *SER* | *IR* | *G* | **IA** |
| --- | --- | --- | --- | --- | --- | --- | --- | --- | --- |
| Workers | Freedom of association and collective bargaining | 3 | + | + | + | + | - | - | 2 |
| Child labour | 2 | + | + | + | + | + | + | 2 |
| Fair Salary | 2 | + | + | + | + | + | + | 2 |
| Working hours | 3 | + | + | + | + | + | + | 2 |
| Forced labour | 2 | + | + | + | + | - | - | 2 |
| Discrimination | 5 | + | + | + | + | + | + | 6 |
| Health and safety | 3 | + | + | - | + |  | - | 3 |
| Social benefits | 4 | + | - | + | - | + | + | 4 |
|  | **Amount** | 3 |  |  |  |  |  |  | 5 |
| Local community | Access to material resources | 4 | + | + | + | - | + | + | 3 |
| Access to immaterial resources | 3 | + | + | + | + | + | + | 3 |
| Delocalisation and migration | 3 | - | - | - | - | - | - | 4 |
| Cultural heritage | 3 | - | + | + | + | + | - | 2 |
| Safe and healthy living conditions | 4 | + | + | + | - | - | + | 4 |
| Respect of indigenous rights | 2 |  |  | + | + | + | + | 2 |
| Local employment | 1 |  |  |  | + |  | + | 2 |
| Secure living conditions | No data |  |  |  |  |  |  | - |
|  | **Amount** | 2,9 |  |  |  |  |  |  | 2.9 |
| Society | Public commitments to sustainable issues | 4 | - | - | - |  | - | - | 5 |
| Contribution to economic development | 1 | + | + | + | + | + | + | 1 |
| Prevention and mitigation of conflicts | 3 | - | - | - | - | - | - | 4 |
| Technology development | 3 | + | + | + |  | - | + | 3 |
| Corruption | 2 | - | - | - | - | - | - | 4 |
|  | **Amount** | 2,6 |  |  |  |  |  |  | 3.4 |
|  | **Total amount** | 2,8 |  |  |  |  |  |  | 3.78 |

**Table 4 – Social Impact Assessment Table International Sourcing**

‘+’ = major impact; ‘-‘ = minor impact; ‘ ’= no impact**[[41]](#footnote-41)**

# Section 3. LCC

# **Inventory data**

The table below presents general data concerning the transportation costs from the manufacturing facility to the final destination (i.e., the refugee camps in Dadaab and Kakuma respectively).

| **Stage** | **India to Nairobi** | | **Nairobi to Dadaab** | | **Nairobi to Kakuma** | |
| --- | --- | --- | --- | --- | --- | --- |
| **Container size/  pallets** | *Per unit* | *Total* | *Per unit* | *Total* | *Per unit* | *Total* |
| 20 DC - Palletized | $3.09 | $3,540 | $1.14 | $1,300 | $2.14 | $2,450 |
| Non-palletized | $2.49 | $0.92 | $1.73 |
| 40 DC - Palletized | $2.55 | $6,105 | $0.92 | $2,200 | $1.30 | $3,100 |
| Non-palletized | $2.18 | $0.79 | $1.11 |

**Table 5 – Economic transport data International Sourcing (Source: UNHCR)**

1. ILO (2015) http://www.ilo.org/dyn/normlex/en/f?p=1000:11200:0::NO:11200:P11200_COUNTRY_ID:102691 [↑](#footnote-ref-1)
2. http://pblabour.gov.in/pdf/acts_rules/inustrial_disputes_act_1947.pdf [↑](#footnote-ref-2)
3. http://www.industriall-union.org/sites/default/files/migration/imf/RelatedFiles/
   08040111112266/IMF_Indian_steel_report.pdf [↑](#footnote-ref-3)
4. D.Singh (2008). Industrial Relations and Labour Laws. Excel Books: New Delhi. [↑](#footnote-ref-4)
5. http://www.indiannewsandtimes.com/2015/08/13/steel-associations-across-india-come-together-to-protest-proposed-bis-order/ [↑](#footnote-ref-5)
6. ILO (2015) retrieved from http://www.ilo.org/ipec/Regionsandcountries/Asia/India/WCMS_203643/lang--en/index.htm [↑](#footnote-ref-6)
7. http://www.ilo.org/global/about-the-ilo/media-centre/press-releases/WCMS_008058/lang--en/index.htm [↑](#footnote-ref-7)
8. Kessentials (2015) retrieved 13-8-2015 from http://www.kessentials.com/about.html [↑](#footnote-ref-8)
9. http://www.ilo.org/dyn/normlex/en/f?p=1000:11200:0::NO:11200:P11200_COUNTRY_ID:102691 [↑](#footnote-ref-9)
10. http://www.reports-and-materials.org/sites/default/files/reports-and-materials/AI-NL-Forced-Labour-report-Feb-2006.pdf [↑](#footnote-ref-10)
11. ILO Global Wage Report 2014/2015 – Asia and the Pacific Supplement http://www.ilo.org/wcmsp5/groups
    /public/---asia/---ro-bangkok/---sro-bangkok/documents/publication/wcms_325219.pdf [↑](#footnote-ref-11)
12. http://www.ilo.org/dyn/travail/travmain.sectionReport1?p_lang=en&p_countries=IN&p_sc_
    id=1001&p_year=2011&p_structure=2 [↑](#footnote-ref-12)
13. http://www.ilo.org/ilostat/faces/home/statisticaldata/ContryProfileId?_afrLoop=
    633439487431192#%40%3F_afrLoop%3D633439487431192%26_adf.ctrl-state%3D163sq0yaap_190 [↑](#footnote-ref-13)
14. http://www.genderindex.org/ranking?order=field_sigi_value14_value&sort=asc [↑](#footnote-ref-14)
15. http://steel.gov.in/overview.htm [↑](#footnote-ref-15)
16. Unicef (2015) retrieved 15-8-2015 from http://www.unicef.org/infobycountry/india_statistics.html [↑](#footnote-ref-16)
17. http://planningcommission.gov.in/aboutus/committee/wrkgrp12/wg_steel2212.pdf [↑](#footnote-ref-17)
18. National Geographic (2015) retrieved 18-8 from http://ngm.nationalgeographic.com/2015/04/india-coal/conflict-map [↑](#footnote-ref-18)
19. Dunham (2015) Freedom of the press 2015. Freedom House. https://freedomhouse.org/sites/
    default/files/FreedomofthePress_2015_FINAL.pdf [↑](#footnote-ref-19)
20. Economic Times (2014) http://articles.economictimes.indiatimes.com/2014-11-28/news/56540685
    _1_narendran-tata-steel-human-development-index [↑](#footnote-ref-20)
21. IMO (2015) http://www.iom.int/countries/india/facts-and-figures [↑](#footnote-ref-21)
22. http://www.ifrcmedia.org/assets/pages/wdr2012/styled/chapter5/indiasaga/index.html [↑](#footnote-ref-22)
23. http://www.tata.com/sustainability/articlesinside/The-rainbow-effect [↑](#footnote-ref-23)
24. http://www.iwgia.org/regions/asia/india [↑](#footnote-ref-24)
25. http://www.portal.gsi.gov.in/portal/page?_pageid=127,697649&_dad=portal&_schema=PORTAL [↑](#footnote-ref-25)
26. WHO (2013) http://apps.who.int/iris/bitstream/10665/170250/1/9789240694439_eng.pdf?ua=1&ua=1 [↑](#footnote-ref-26)
27. http://www.tbcindia.nic.in/key.html [↑](#footnote-ref-27)
28. http://www.hindustantimes.com/india-news/india-s-cities-more-polluted-than-china-but-there-is-still-hope/article1-1355013.aspx [↑](#footnote-ref-28)
29. Kanchan, S. (2013) Pollution and Control in steel industry. [↑](#footnote-ref-29)
30. http://www.ilo.org/ilostat/faces/home/statisticaldata/ContryProfileId?
    _afrLoop=1132002665036949#%40%3F_afrLoop%3D1132002665036949%26_adf.ctrl-state%3Dndxftil0r_190 [↑](#footnote-ref-30)
31. http://alpinter.com/production.html [↑](#footnote-ref-31)
32. http://www.forbes.com/places/india/ [↑](#footnote-ref-32)
33. http://indiainbusiness.nic.in/newdesign/index.php?param=industryservices_landing/349/1 [↑](#footnote-ref-33)
34. http://www.geneva-academy.ch/RULAC/current_conflict.php?id_state=107 [↑](#footnote-ref-34)
35. http://indiatoday.intoday.in/story/india-had-most-religious-conflicts-in-2013-china-restrictions-study/1/421277.html [↑](#footnote-ref-35)
36. http://www.bbc.com/news/world-asia-india-31705131 [↑](#footnote-ref-36)
37. http://steel.gov.in/Scheme%20for%20promotion%20of%20Research%20&%20Development%20in
    %20Indian%20Iron%20&%20Steel%20Industry.htm [↑](#footnote-ref-37)
38. http://www.ey.com/IN/en/Services/Assurance/Fraud-Investigation---Dispute-Services/Bribery-and-corruption-ground-reality-in-India [↑](#footnote-ref-38)
39. http://www.worldaudit.org/corruption.htm [↑](#footnote-ref-39)
40. UNEP/SETAC (2009) retrieved 11-05-2015 from http://www.unep.org/pdf/DTIE_PDFS/DTIx1164x PA-guidelines_sLCA.pdf [↑](#footnote-ref-40)
41. According to method Ciroth and Franze (2011). [↑](#footnote-ref-41)
