# Supplementary material for: Using life cycle sustainability assessment to trade off sourcing strategies for humanitarian relief items
Source: Springer Nature journal article supplement (doi:10.1007/s11367-016-1245-z), 2016-12-17
Supplement: MOESM2 [file 11939184]

SUPPLEMENT 2. DATA LOCAL SOURCING SCENARIO

**Section 1. Environmental LCA International Sourcing Scenario**

**Inventory Data**

Table 1 presents general product data concerning weight and volume of the kitchen set.

| **Component** | **Material** | **Weight** | **Volume** |
| --- | --- | --- | --- |
| Kitchen set | Mainly Stainless Steel | Net weight 1kg/set |  |
| Packaging | Double corrugated, export quality cardboard | Gross weight per export carton with 4 sets: 4.7 kg. | ± 0.022 m3 (0.3 x 0.3 x 0.25m.) |
| Seal | Plastic 10 mm straps | - |  |

**Table 1 – Weight and volume of kitchen set (Source: UNHCR)**

Impact Assessment

Using the ReCiPe method (See Supplement 3), we analyzed the inventory data in order to determine the impacts of local sourcing (production and transportation) on the environment (impact assessment). The figures below present the results of the enviornmental impact assessment. These impact categories are described in Section 4 of the paper. The impact categories are shown in Table 2. The background calculations can be found in Supplement 3 (Excelsheet E-LCA).

| **Midpoint Impact category** | **Endpoint Impact category** |
| --- | --- |
| Climate change (CC)  Ozone depletion (OZ)  Terrestrial acidification (TA)  Freshwater eutrophication (FE)  Marine eutrophication (ME)  Human toxicity (HT)  Photochemical oxidant formation (POF)  Particulate matter formation (PMF)  Terrestrial ecotoxicity (TET)  Freshwater ecotoxicity (FET)  Marine ecotoxicity (MET)  Ionising radiation (IR)  Agricultural land occupation (ALO)  Urban land occupation (ULO)  Natural land transformation (NLT)  Water depletion (WD)  Mineral resource depletion (MRD)  Fossil fuel depletion (FD) | Damage to Human Health (HH)  Damage to Ecosystem Diversity (ED)  Damage to Resource Availability (RA) |

**Table 2 – Environmental Impact Categories (Goedkoop et al., 2013)**

Figure 1 shows the environmental endpoint impacts of the local sourcing strategy.

**Figure 1- Environmental Endpoint Impacts of Local Sourcing (based on emissions according to ReCiPe).**

Figure 2 shows how production and transportation phases contribute to environmental endpoint impacts in the case of international sourcing. We conclude that the production phase is responsible for more than 89% of impacts both on human health and on ecosystems. Interestingly this percentage is smaller compared to the international sourcing case.

**Figure 2- The relative impact of Production and Transportation phase on Endpoint Impacts, Local Sourcing**

Figure 3 shows the environmental midpoint impacts of production and transportation under the local sourcing scenario. The main impact here is again climate change. The relative impact on climate change of production and transportation (Figure 4) shows a dominance of production.

**Figure 3 – Environmental Midpoint Impacts Local Sourcing (based on emissions according to ReCiPe).**

**Figure 4 – The production and transportation relative impact on climate change (based on CO2 emissions according to ReCiPe) Local Sourcing**

Going back to end point impacts, the ultimate effects of interest, Figure 5 shows a comparison between the international and local sourcing scenario.

**Figure 5 – Comparison of endpoint impacts international versus local sourcing**

# Section 2: Social LCA

Inventory Data
Data for the social life cycle assessment have been obtained via online (statistics) databases (amongst others databases of UNICEF and the International Labour Organization (ILO)), and additional company and government online resources. Indicators Social-LCA According to UNEP/SETAC (Ciroth & Franze, 2011).

**Stakeholder group Workers – production in Kenya**

| **Subcategory** | **Indicator** | **Status** |
| --- | --- | --- |
| **Freedom of association and collective bargaining** | Evidence of restriction freedom of association and collective bargaining in country/ sector | Kenya did ratify the core convention of the international labor organization C.98 (Right to organize and collective bargaining convention), but did not ratify C.87 (Freedom of association and Protection of the right to organize convention)[[1]](#footnote-1). The process of collective bargaining is not specifically provided for in law.[[2]](#footnote-2) |
| Presence of unions within the sector and description of their influence | The Central Organization of Trade Unions has 40 affiliated unions and represents around 1 million workers.[[3]](#footnote-3) Unions seem to be quite successful in negotiating collective agreements.[[4]](#footnote-4) |
| **Child labour** | Percentage of child labour in country/ sector | Kenya did ratify the core conventions concerning child labour C.138 and C.182 of ILO.[[5]](#footnote-5) Minimum working age is 16 years. However, light work is allowed for children aged 13-16 years and the minimum age restriction does not apply to employees who belong at the same family as the employer.[[6]](#footnote-6) Evidence can be found that the government supported programs to address child labour in 2014.[[7]](#footnote-7) |
| **Forced Labour** | Frequency of forced labour in country/ sector | Kenya ratified the ILO conventions C.29 and C.105 concerning forced labour. [[8]](#footnote-8) According to some sources however, these laws are not enforced properly.[[9]](#footnote-9) |
| **Fair Salary** | Specification of living wage and minimum wage in the country | According to the Labour Institutions Act 2007, wages are required to be set at least equal to the minimum wage, this varies per sector.[[10]](#footnote-10) Minimum wages for low skilled at medium skilled work does not cover the minimum living wage, for high skilled work it does.[[11]](#footnote-11) Spartan Relief reports average wages compared to the rest of the sector. |
|  | Wage level of the worker with lowest income and description of payment performance of the sector | Low skill wage equals 6500 KES a month at minimum (which equals approximately 64 US dollars). |
| **Working time** | Hours work per employee and month in average | Normal working week is 52 hours per week, implying 208 hours per month. No data available on Spartan Relief Supplies Ltd. |
| Number of days without work per week | The number of days is not specified by law. However, employees are entitled to 24 consecutive hours of rest per week.[[12]](#footnote-12) |
| Description of how overtime is handled | An employer is required to pay at least 150% of the wage in case of overtime.[[13]](#footnote-13) A worker is only allowed to work 6 hours of overtime a week. |
| **Discrimination** | Percentage of women in the labour force in the sector | Approximately 26.3% of the workforce in the manufacturing industry is female.[[14]](#footnote-14) |
| Country gender index ranking | Rank 69 of 108 (Genderindex, 2014)[[15]](#footnote-15) |
| Occurrence of discrimination in the country/ sector | According to the Genderindex (2014) there is a medium level of discrimination in the country. “Women have an inferior legal status in various aspects, e.g. of inheritance and property of ownership” (Labour market profile Kenya, 2014; pp.2). At Spartan Relief gender and ethnic background are rarely criteria for hiring employees. |
| Ratio of salary of women to wages of men in sector | On average, women earn 8% less than men. At Spartan Relief, men and women earn the same. |
| **Health and safety** | Description of potential main origins of danger | No data available |
| Accident rate of the country/ sector | No sector data available. Spartan Relief reports no accidents. |
| **Social benefits/ Social security** | Social security expenditures of the country/ sector | 4,5% of GDP in 2013 (country) (WHO, 2015)[[16]](#footnote-16) |

Health and Safety: In Kenya, lack of awareness on the Occupational Safety Health Act of 2007 undermines the safety and health of workers. This has partly contributed to the weak safety culture in the workplace and non-compliance with international safety and health standards (Kenya Industrialization Policy Framework, 2010 via WHO ( 2015)).

“The availability of steel and steel products in the country will create a very strong economy for Kenya. The countries in East and Central Africa will source their steel products from Kenya. It is worth noting that there does not exist any iron ore processing industry in Africa save for South Africa, so with the strategic location of Kenya, the country stands to benefit greatly from the proposed venture” (Kenya Industrialization Policy Framework, 2010 via WHO ( 2015; p.13))

**Stakeholder group Local community – production in Kenya**

| **Subcategory** | **Indicator** | **Status** |
| --- | --- | --- |
| **Access to material resources** | Extraction of material sources and level industrial water use | In Kenya, the steel industry forms about 13% of the manufacturing sector. No local raw materials are extracted. The local steel industry is dependent on imported raw materials.[[17]](#footnote-17) The government has developed a plan, Vision 2030, to develop the local extraction of raw materials. |
| Percent of population with access to improved sanitation facilities | 29,4% in 2011 (Unicef, 2015). [[18]](#footnote-18) |
| Existence of projects to improve community infrastructure | In the Vision 2030 plan, development of infrastructure by the government is also included. Furthermore, the East African Community works on infrastructure improvement in Kenya.[[19]](#footnote-19) Finally, the World Bank invests a significant amount of money into the infrastructure and competitiveness of East Africa, including Kenya.[[20]](#footnote-20) |
| Presence of certified environmental management systems | No data available on whether companies are ISO 14001 certified. Though it seems that ISO standards in general are still in the infant stage in Kenya (William, n.d.).[[21]](#footnote-21) Spartan Relief reports no environmental management systems. |
| Description of (potential) material resource conflicts | The main source for conflicts in Kenya results from different community identities. Though natural resources (such as oil, coal, metals, water) and land are also seen as sources of conflicts.[[22]](#footnote-22) There is no data available on the magnitude and/ or frequency of these. |
| **Access to immaterial resources** | Freedom of expression in country/ sector | According to Freedomhouse (2015), Kenya’s press status is partly free. Throughout the year media were intimidated to stifle reporting on the worsening security situation.[[23]](#footnote-23) No sector-specific information could be found. |
| Annual arrests connected to protest of sector actions | No information on sector-related arrests available. |
| Presence of community  education initiatives and  community service programmes | No information is available on the involvement of Spartan Relief Supplies Ltd. in community education/ service programmes. However United Nations Girls Education Initiative[[24]](#footnote-24) is active in Kenya and the World Food Programme.[[25]](#footnote-25) |

| **Delocalisation**  **and migration** | Migration rate of the country | Kenya has a slightly negative migration rate of -0,2 migrants/1000 inhabitants (IMO, 2015).[[26]](#footnote-26) |
| --- | --- | --- |
| Number of individuals who  resettle that can be attributed  to the sector | No exact numbers can be found. Though forced migration occurs because of infrastructure development projects[[27]](#footnote-27) or redistribution of land.[[28]](#footnote-28) |
| **Cultural heritage** | Respect of the sector regarding  local cultural heritage  including language,  social and religious practices. | In Kenya different initiatives and organizations are occupied with preserving cultural heritage, for example of the original inhabitants the Masaai.[[29]](#footnote-29) Spartan Relief does not engage in projects to safeguard cultural heritage. |
| **Respect of**  **Indigenous**  **rights** | Human rights issues faced  by indigenous people in the  country | Kenya did not ratify the ILO convention C.169 on the protection of indigenous people. According to the UN the Kenyan government forced indigenous people to leave their land.[[30]](#footnote-30) |
| Respect of the sector regarding  indigenous rights | No information regarding this issue was found. |
| **Safe and**  **healthy living**  **conditions** | Burden of disease in the  Country | Life expectancy at birth amounts 61 years (WHO, 2013).[[31]](#footnote-31) HIV/AIDS is one of the leading causes of mortality in Kenya. |
| Pollution level of the country  and contribution of the  sector to the environmental  load | CO2 emissions equal 0,33 tons per capita (Google public data, 2011)[[32]](#footnote-32) No data available on contribution of the sector. |
| **Secure living conditions** | Crime rate | Kenya ranks 7 of 120 compared to other countries and has thus a relatively high crime rate.[[33]](#footnote-33) |
| Management policies related  to private security  personnel | No information available. |

| **Local Employment** | Percentage of unemployment  in the country | Unemployment rate (2009) amounts 12,2%.[[34]](#footnote-34) |
| --- | --- | --- |
| Percentage of work force  hired locally | 80-100% of the workforce is hired locally at Spartan Relief. |
| **Community Engagement** | Description of community  engagement of the sector | No information available. |

**Stakeholder group Society – Production in Kenya**

| **Public commitment to sustainable issues** | Presence of publicly available promises or agreements on sustainable issues  and complaints to the non-fulfilment of these commitments | “A National Environmental Tribunal has been set up by an Act of Parliament (the Environmental Management and Coordination Act of 1999) and appears to have been highly successful in the years since then” (UNEP, n.d.; p.23).[[35]](#footnote-35) However, no information could be found on public complaints. |
| --- | --- | --- |
| Implementation/signing of  principles or codes of conducts | Spartan Relief did not sign codes of conduct apart from agreements with the UNHCR. |
| **Contribution to economic development** | Economic situation of the country and relevance of the considered sector for  the economy | Kenya has a GDP growth of 5,1%.[[36]](#footnote-36) According to the general country profile Kenya has been disturbed by corruption and reliance on primary goods which prices have remained low. Kenya’s long-term position will be affected by the extent to which infrastructure will be developed. |
| **Prevention and**  **mitigation of**  **conflicts** | Presence of conflicts in the country | Kenya is vulnerable for violence, because of its proximity to Somalia, Sudan, Yemen, and Eritrea, which have been known for the violent, terrorist groups Al Shabaab and Al Qaeda. |
| Risk of conflicts with regard to the sector and measures to reduce the risk | Land use conflicts might be a risk when developing the extraction of raw materials in Kenya. |
| **Technology**  **Development** | Sector efforts in technology  development regarding eco friendliness | No data available. |
| Investments in technology  development | Spartan Relief reported to engage in below average investments in technology development compared to the sector. |
| **Corruption** | Risk of corruption in country  /sector | As said, Kenya has been disturbed by corruption. |

Impact Assessment

An overview of the social impacts is displayed in Table 4. The performance assessment is listed in the PA column. The colours are assigned to the subcategories based on the inventory data (See Data Enclosure 2) and the rating scale (see Table 3). Subsequently it is distinguished if impacts on the impact categories (see Table 2) are rather high (+) or rather low (-), this is context dependent. Then the overall impact can be rated using the same rating scale (see Table 3). Lastly, the averages can be calculated. The rules of Ciroth and Franze (2011) were adopted for calculating the average scores. If at least one subcategory is assessed with a ‘6’, the amount cannot be higher than a ‘5’; if at least one subcategory is assessed with a ‘5’, the amount cannot be higher than a ‘4’. The resulting amount is the average of the calculated amounts of the stakeholder groups.

| Midpoint impact category | Abbreviation |
| --- | --- |
| Working conditions | WC |
| Health and Safety | HS |
| Human Rights | HR |
| Repercussions Socio-Economic | SER |
| Indigenous Rights/ Cultural Heritage | IR |
| Governance | G |

**Table 2 - Social impact categories (UNEP/SETAC, 2009)[[37]](#footnote-37)**

| Performance Assessment (PA) | Impact Assessment (IA) | Colour/factor |
| --- | --- | --- |
| Very good performance | Positive effect | 1 |
| Good performance | Lightly positive effect | 2 |
| Satisfactory performance | Indifferent effect | 3 |
| Inadequate performance | Lightly negative effect | 4 |
| Poor performance | Negative effect | 5 |
| Very poor performance | Very negative effect | 6 |

**Table 3- Rating scale of social impacts according to Ciroth & Franze (2011)**

| **Stakeholder groups** | **Subcategories** | **PA** | *WC* | *HS* | *HR* | *SER* | *IR* | *G* | **IA** |
| --- | --- | --- | --- | --- | --- | --- | --- | --- | --- |
| Workers | Freedom of association and collective bargaining | 2 | + | - | + | - | - | - | 1 |
| Child labour | 3 | + | + | + | - | - | - | 3 |
| Fair Salary | 3 | + | - | - | - |  |  | 3 |
| Working hours | 2 | + | + | + | + | - | + | 1 |
| Forced labour | 3 | + | + | + | - | - | - | 3 |
| Discrimination | 4 | + | - | + | + | - | - | 4 |
| Health and safety | 3 | + | + | - | + | - |  | 3 |
| Social benefits | 4 | + | + | + | - | - | + | 3 |
|  | **Amount** | 3 |  |  |  |  |  |  | 2.6 |
| **Stakeholder groups** | **Subcategories** | **PA** | *WC* | *HS* | *HR* | *SER* | *IR* | *G* | **IA** |
| Local community | Access to material resources | 5 | - | + | + | + | - | - | 4 |
| Access to immaterial resources | 3 | - | - | + | + | - | - | 3 |
| Delocalisation and migration | 3 | - | - | + | + | - | - | 3 |
| Cultural heritage | 4 | - |  | + | - | + | - | 4 |
| Safe and healthy living conditions | 4 | - | + | + | + | - | - | 3 |
| Respect of indigenous rights | 4 | - | - | + | + | + | - | 3 |
| Local employment | 1 |  |  |  | + |  | + | 2 |
| Secure living conditions | 6 | - | + | + | + | - | - | 5 |
|  | **Amount** | 5 |  |  |  |  |  |  | 4 |
| Society | Public commitments to sustainable issues | 3 | - | + | - | - | - | + | 2 |
| Contribution to economic development | 3 | + | + | - | + | - | + | 2 |
| Prevention and mitigation of conflicts | 3 | - | + | + | + | - | - | 3 |
| Technology development | 4 | + | + |  | + |  | - | 4 |
| Corruption | 5 | + | + | - | + | - | + | 4 |
|  | **Amount** | 4 |  |  |  |  |  |  | 3.2 |
|  | **Total amount** | 4 |  |  |  |  |  |  | 3.23 |

**Table 4 – Social Impact Assessment Table Local Sourcing**

‘+’ = major impact; ‘-‘ = minor impact; ‘ ’= no impact **[[38]](#footnote-38)**

# Section 3. LCC

# **Inventory data**

The table below presents general data concerning the transportation costs from the manufacturing facility to the final destination (i.e., the refugee camps in Dadaab and Kakuma respectively).

| **Stage** | **Nairobi to Dadaab** | | **Nairobi to Kakuma** | |
| --- | --- | --- | --- | --- |
| **Container size/  pallets** | *Per unit* | *Total* | *Per unit* | *Total* |
| 20 DC - Palletized | $1.14 | $1,300 | $2.14 | $2,450 |
| Non-palletized | $0.92 | $1.73 |
| 40 DC - Palletized | $0.92 | $2,200 | $1.30 | $3,100 |
| Non-palletized | $0.79 | $1.11 |

**Table 5 – Economic transport data Local Sourcing (Source: UNHCR)**

1. ILO (2015) http://www.ilo.org/dyn/normlex/en/f?p=1000:11200:0::NO:11200:P11200_COUNTRY_ID:103315 [↑](#footnote-ref-1)
2. http://www.africapay.org/kenya/home/labour-laws/employment-security/collective-bargaining-agreements [↑](#footnote-ref-2)
3. http://www.commonwealthofnations.org/sectors-kenya/civil_society/trade_unions/ [↑](#footnote-ref-3)
4. http://www.mywage.org/kenya/home/labour-laws/collective-agreements-database [↑](#footnote-ref-4)
5. ILO (2015) [↑](#footnote-ref-5)
6. http://www.africapay.org/kenya/home/labour-laws/fair-treatment-at-work/children-at-work [↑](#footnote-ref-6)
7. http://www.dol.gov/ilab/reports/child-labor/findings/2014TDA/kenya.pdf [↑](#footnote-ref-7)
8. ILO (2015) [↑](#footnote-ref-8)
9. http://www.refworld.org/cgi-bin/texis/vtx/rwmain?page=topic&docid=559bd55d12&skip=0&tocid=50ffbce582&toid=50ffbce5b2&querysi=kenya&searchin=title&sort=date [↑](#footnote-ref-9)
10. http://www.africapay.org/kenya/home/labour-laws/work-and-wages [↑](#footnote-ref-10)
11. http://www.africapay.org/kenya/home/salary/cost-of-living-survey/global-living-wage-map [↑](#footnote-ref-11)
12. http://www.africapay.org/kenya/home/labour-laws/work-time-holiday [↑](#footnote-ref-12)
13. http://www.africapay.org/kenya/home/labour-laws/compensation [↑](#footnote-ref-13)
14. Labour market profile Kenya (2014) http://www.ulandssekretariatet.dk/sites/default/files/uploads/public/PDF/LMP/lmp_kenya_2014_final_version.pdf [↑](#footnote-ref-14)
15. Genderindex (2014) http://www.genderindex.org/ranking?order=field_sigi_value14_value&sort=asc [↑](#footnote-ref-15)
16. WHO (2015) http://www.who.int/countries/ken/en/ [↑](#footnote-ref-16)
17. http://www.industrialization.go.ke/index.php/vision-2030-manufacturing-sector/137-development-of-iron-and-steel-industry [↑](#footnote-ref-17)
18. Unicef (2015) http://www.unicef.org/infobycountry/kenya_statistics.html [↑](#footnote-ref-18)
19. http://www.eac.int/infrastructure/ [↑](#footnote-ref-19)
20. http://www.worldbank.org/en/news/press-release/2014/11/29/world-bank-group-to-provide-12-billion-to-improve-infrastructure-and-competitiveness-of-east-african-community [↑](#footnote-ref-20)
21. William (n.d.) The role of ISO standards in Kenya’s economy, retrieved from: http://www.iso.org/iso/
    iso_essay_contest-2012.pdf [↑](#footnote-ref-21)
22. http://www.transconflict.com/gcct/gcct-members/africa/eastern-africa/kenya/conflict-in-kenya/ [↑](#footnote-ref-22)
23. Freedomhouse (2015) https://freedomhouse.org/report/freedom-press/2015/kenya [↑](#footnote-ref-23)
24. http://www.ungei.org/infobycountry/kenya_206.html [↑](#footnote-ref-24)
25. http://www.international.gc.ca/development-developpement/stories-histoires/kenya/feed_school_children-nourrir_ecoliers.aspx?lang=eng [↑](#footnote-ref-25)
26. http://www.iom.int/countries/kenya/facts-and-figures [↑](#footnote-ref-26)
27. http://www.eac.int/~eacint/migration/index.php?option=com_content&view=article&id=145&Itemid=107 [↑](#footnote-ref-27)
28. http://www.fmreview.org/crisis/kiama-koome [↑](#footnote-ref-28)
29. http://www.museums.or.ke/component/option,com_frontpage/Itemid,1/ & http://www.maasai-association.org/mcc/mission.html [↑](#footnote-ref-29)
30. http://www.un.org/apps/news/story.asp?NewsID=46914#.VlM9ELcvfIU [↑](#footnote-ref-30)
31. http://apps.who.int/iris/bitstream/10665/170250/1/9789240694439_eng.pdf?ua=1&ua=1

    http://www.tbcindia.nic.in/key.html [↑](#footnote-ref-31)
32. Google Public Data (2011) http://www.google.com/publicdata/explore?ds=d5bncppjof8f9_&ctype=l&strail=false&nselm=h&met_y=en_atm_co2e_pc&hl=en&dl=en#!ctype=l&strail=false&bcs=d&nselm=h&met_y=en_atm_co2e_pc&scale_y=lin&ind_y=false&rdim=region&idim=region:SSF&idim=country:KEN&ifdim=region&tstart=-287283600000&tend=1322089200000&hl=en_US&dl=en&ind=false [↑](#footnote-ref-32)
33. http://ilo.org/ilostat/faces/home/statisticaldata/ContryProfileId;jsessionid=op85pEBmiNOEJG1Hu_
    J2Fb2eowL5DHeo5VJLEkk3ou4gqX0_9T_Q!1546527395?_afrLoop=106878187021587&_adf.ctrl-state=ndxftil0r_19#%40%3F_afrLoop%3D106878187021587%26_adf.ctrl-state%3D1cnf1owgcn_4 [↑](#footnote-ref-33)
34. [↑](#footnote-ref-34)
35. UNEP (n.d.) http://www.unep.org/delc/Portals/119/publications/enforcement-environmental-laws.pdf [↑](#footnote-ref-35)
36. http://www.forbes.com/places/kenya/ [↑](#footnote-ref-36)
37. UNEP/SETAC (2009) retrieved 11-05-2015 from http://www.unep.org/pdf/DTIE_PDFS/DTIx1164x PA-guidelines_sLCA.pdf [↑](#footnote-ref-37)
38. According to method Ciroth and Franze (2011). [↑](#footnote-ref-38)
