# Supplementary material for: Using life cycle sustainability assessment to trade off sourcing strategies for humanitarian relief items
Source: Springer Nature journal article supplement (doi:10.1007/s11367-016-1245-z), 2016-12-17
Supplement: MOESM3 [file 11939184]

## Sheet: Introduction
	Calculations Environmental LCA - Comparing international sourcing (India) with local sourcing (Kenya)
	Introduction
	- This spreadsheet contains the calculations made for the environmental Life Cycle Analysis
	for the paper 'Using Life Cycle Sustainability Assessment to trade off sourcing strategies for humanitarian relief items'
	- Two scenarios are compared: international sourcing (India) and local sourcing (Kenya)
	- The supply chain stages of production and transporation are considered in this scenario
	Contents
	India	Calculations for the international sourcing scenario (See Section 4.1 & Data Enclosure 1)
	Kenya	Calculations for the local sourcing scenario (See Section 4.2 & Data Enclosure 2)
	Comparison	Comparison between the scenarios: displayed in graphs and tables (See Section 5 & Data Enclosure 2)

## Sheet: India
1.	PRODUCTION								Impact category	Indicator name	unit
		Output kitchen set (kg)	228378						Damage to Human health	Disability-adjusted loss of life years	years
		Required energy (Kwh)	895830						Damage to Ecosystem Diversity	Loss of species during a year	years
		Scrap rate (scrap/total inputs)	0.3						Damage to Resource Availability	Increased costs	dollars
		Production for 1 ton of product				Midpoint impact		Endpoint impact
		Kwh/ton product	CO2kg/Kwh	kg CO2		ReCiPe Factor	Climate Change	ReCiPe Factor	Human Health	ReCiPe Factor	Ecosystems	ReCiPe Factor	Resources
		3922.57	1	3922.57		1	3922.57	1.4e-06	0.00549159	7.92893e-09	3.11018e-05	0	0
									0.994368		0.00563162		0
2.	TRANSPORTATION
	Leg 1 Steel plant - Mumbai (rail)		Leg 2 Mumbai - kitchen set supplier (truck)		Leg 3 kitchen set supplier - Mumbai harbour (truck)		Leg 4 Mumbai - Mombasa (sea freight)		Leg 5 Mombasa - Dadaab (truck)		SUM
	Distance (km)	1700.27	Distance (km)	81.33	Distance (km)	104.39	Distance (km)	4463.43	Distance (km)	599.67	6949.09
	kg NOx	0.5	kg NOx	0.02	kg NOx	0.02	kg NOx	0.4	kg NOx	0.1	1.04
	kg SO2	0.02	kg SO2	0.004	kg SO2	0.004	kg SO2	0.4	kg SO2	0.01	0.438
	kg CO2	40	kg CO2	7	kg CO2	8	kg CO2	30	kg CO2	40	125
	kg NMHC	0.06	kg NMHC	0.002	kg NMHC	0.003	kg NMHC	0.03	kg NMHC	0.01	0.105
	kg PM	0.02	kg PM	0.0004	kg PM	0.0004	kg PM	0.05	kg PM	0.002	0.0728
	Leg 1 Steel plant - Mumbai (rail)		Leg 2 Mumbai - kitchen set supplier (truck)		Leg 3 kitchen set supplier - Mumbai harbour (truck)		Leg 4 Mumbai - Mombasa (sea freight)		Leg 5b Mombasa - Kakuma (truck)		SUM
	Distance (km)	1700.27	Distance (km)	81.33	Distance (km)	104.39	Distance (km)	4463.43	Distance (km)	1203.16	7552.58
	kg NOx	0.5	kg NOx	0.02	kg NOx	0.02	kg NOx	0.4	kg NOx	0.2	1.14
	kg SO2	0.02	kg SO2	0.004	kg SO2	0.004	kg SO2	0.4	kg SO2	0.03	0.458
	kg CO2	40	kg CO2	7	kg CO2	8	kg CO2	30	kg CO2	70	155
	kg NMHC	0.06	kg NMHC	0.002	kg NMHC	0.003	kg NMHC	0.03	kg NMHC	0.02	0.115
	kg PM	0.02	kg PM	0.0004	kg PM	0.0004	kg PM	0.05	kg PM	0.004	0.0748
		Transportation for 1 ton of product				Midpoint impact		Endpoint impact
		kg Emissions				ReCiPe factor		ReCiPe Factor	Human Health	ReCiPe Factor	Ecosystems	ReCiPe Factor	Resources
	NOx (Nitrate MEP)	1.09			Marine Eutroph	0.028	0.03052	0	0	0	0	0	0
	SO2	0.448			Terrestrial acidification	1	0.448	0	0	5.8e-09	2.5984e-09	0	0
	CO2	140			Climate Change	1	140	1.4e-06	0.000196	7.92893e-09	1.11005e-06	0	0
	HC (Methaan)	0.11			Photochemical Oxidant Formation	0.0101351	0.00111486	3.939e-10	4.39145e-13	0	0	0	0
	PM	0.0738			Particulate Matter Formation	1	0.0738	0.00026	1.9188e-05	0	0	0	0
	218500
									Human Health	Human Health	Ecosystems	Ecosystems	Resources			140.553
								Production	0.00549159	0.962293	3.11018e-05	0.965461
			Climate change					Transportation	0.000215188	0.0377074	1.11265e-06	0.0345388			Marine Eutroph	0.03052	0.000217142
		Production	3922.57						0.00570678		3.22144e-05				Terrestrial acidification	0.448	0.0031874
		Transportation	140	Production	Climate Change	3922.57	0.965408								Climate Change	140	0.996062
				Transportation	Marine Eutroph	0.03052	7.51147e-06								Photochemical Oxidant Formation	0.00111486	7.93196e-06
					Terrestrial acidification	0.448	0.00011026								Particulate Matter Formation	0.0738	0.000525067
					Climate Change	140	0.0344563
					Photochemical Oxidant Formation	0.00111486	2.74386e-07
					Particulate Matter Formation	0.0738	1.81634e-05
						4063.12

## Sheet: Kenya
1.	PRODUCTION
		Output kitchen set (kg)	418000
		Required energy (Kwh)	152000
		Scrap rate (scrap/total inputs)	0.35
		Production for 1 ton of product				Midpoint impact		Endpoint impact
		Kwh/ton product	CO2kg/Kwh	kg CO2		ReCiPe Factor	Climate Change	ReCiPe Factor	Human Health	ReCiPe Factor	Ecosystems	ReCiPe Factor	Resources
		363.636	1	363.636		1	363.636	1.4e-06	0.000509091	7.92893e-09	2.88325e-06	0	0
									0.994368		0.00563154		0
		Production for 1 ton of product
		M^3				Midpoint impact		Endpoint impact
		1.97368				ReCiPe Factor	Water depletion	None
						1	1.97368
2.	TRANSPORTATION
	Leg 1 Steel plant - Mumbai (rail)		Leg 2 Mumbai - Mumbai harbour (truck)		Leg 3 Mumbai - Mombasa (sea freight)		Leg 4 Mombasa - kitchen set supplier (truck)		Leg 5 kitchen set supplier - Dadaab		SUM
	Distance (km)	1700.27	Distance (km)	77.21	Distance (km)	4463.43	Distance (km)	488.99	Distance (km)	481.81	7211.71
	kg NOx	0.6	kg NOx	0.02	kg NOx	0.6	kg NOx	0.1	kg NOx	0.08	1.4
	kg SO2	0.02	kg SO2	0.004	kg SO2	0.6	kg SO2	0.02	kg SO2	0.01	0.654
	kg CO2	40	kg CO2	7	kg CO2	40	kg CO2	40	kg CO2	30	157
	kg NMHC	0.06	kg NMHC	0.002	kg NMHC	0.04	kg NMHC	0.01	kg NMHC	0.009	0.121
	kg PM	0.02	kg PM	0.0004	kg PM	0.07	kg PM	0.002	kg PM	0.002	0.0944
	Leg 1 Steel plant - Mumbai (rail)		Leg 2 Mumbai - Mumbai harbour (truck)		Leg 3 Mumbai - Mombasa (sea freight)		Leg 4 Mombasa - kitchen set supplier (truck)		Leg 5 kitchen set supplier - Kakuma		SUM
	Distance (km)	1700.27	Distance (km)	77.21	Distance (km)	4463.43	Distance (km)	488.99	Distance (km)	716.03	7445.93
	kg NOx	0.6	kg NOx	0.02	kg NOx	0.6	kg NOx	0.1	kg NOx	0.1	1.42
	kg SO2	0.02	kg SO2	0.004	kg SO2	0.6	kg SO2	0.02	kg SO2	0.02	0.664
	kg CO2	40	kg CO2	7	kg CO2	40	kg CO2	40	kg CO2	40	167
	kg NMHC	0.06	kg NMHC	0.002	kg NMHC	0.04	kg NMHC	0.01	kg NMHC	0.01	0.122
	kg PM	0.02	kg PM	0.0004	kg PM	0.07	kg PM	0.002	kg PM	0.002	0.0944
		Transportation for 1 tonne of product				Midpoint impact		Endpoint impact
		kg Emissions				ReCiPe factor		ReCiPe Factor	Human Health	ReCiPe Factor	Ecosystems	ReCiPe Factor	Resources
	NOx (Nitrate MEP)	1.41			Marine Eutroph	0.028	0.03948	0	0	0	0	0	0
	SO2	0.659			Terrestrial acidification	1	0.659	0	0	5.8e-09	3.8222e-09	0	0
	CO2	162			Climate Change	1	162	1.4e-06	0.0002268	7.92893e-09	1.28449e-06	0	0
	HC (Methaan)	0.1215			Photochemical Oxidant Formation	0.0101351	0.00123142	3.939e-10	4.85056e-13	0	0	0	0
	PM	0.0944			Particulate Matter Formation	1	0.0944	0.00026	2.4544e-05	0	0	0	0
				Climate Change
			Production	363.636	0.691802
			Transportation	162	0.308198						Human Health	Ecosystems	Resources
				525.636						Production	0.896033	0.897846
										Tranportation	0.103967	0.102154		Marine Eutroph	0.03948	0.000242515
														Terrestrial acidification	0.659	0.00404806
						Production	Climate Change	363.636	0.688178					Climate Change	162	0.995122
							Water depletion	1.97368	0.00373518					Photochemical Oxidant Formation	0.00123142	7.56427e-06
						Transportation	Marine Eutroph	0.03948	7.47155e-05					Particulate Matter Formation	0.0944	0.000579874
							Terrestrial acidification	0.659	0.00124715						162.794
							Climate Change	162	0.306584
							Photochemical Oxidant Formation	0.00123142	2.33045e-06
							Particulate Matter Formation	0.0944	0.000178651
								528.404

## Sheet: Comparison
	COMPARISON
	Midpoint Impacts
			International sourcing	Local sourcing
	Production	Climate change	3922.57	363.636
		Water depletion	-	1.97368
	Transportation	Marine Eutroph	0.03052	0.03948
		Terrestrial acidification	0.448	0.659
		Climate Change	140	162
		Photochemical Oxidant Formation	0.00111486	0.00123142
		Particulate Matter Formation	0.0738	0.0944
	Endpoint Impacts
			Human health	Ecosystems
	International sourcing	Production	0.00549159	3.11018e-05
		Transportation	0.000215188	1.11265e-06
	Local sourcing	Production	0.000509091	2.88325e-06
		Transportation	0.000251344	1.28831e-06
		International sourcing		Local sourcing
		Production	Transportation	Production	Transportation
	Human health	0.00549159	0.000215188	0.000509091	0.000251344
	Ecosystems	3.11018e-05	1.11265e-06	2.88325e-06	1.28831e-06
	SUM	0.0055227	0.000216301	0.000511974	0.000252632
