# Supplementary material for: Using life cycle sustainability assessment to trade off sourcing strategies for humanitarian relief items
Source: Springer Nature journal article supplement (doi:10.1007/s11367-016-1245-z), 2016-12-17
Supplement: MOESM4 [file 11939184]

SUPPLEMENT 4. Life Cycle Inventory Data Collection

Section 1. General Process Description

Based on interviews with the suppliers, a general description of the production process of a kitchen pot is as follows: stainless steel sheets/ coils are cut into circles, the stainless steel circles are pressed into the required shape of the pot, the pots are pressed to remove the uneven edges and lastly pots are trimmed to remove uneven edges and handles are added.

The production process consists of cutting and assembly of steel materials and there are no differences across the two factories studied. No other materials are used as input besides metal coils and handles and there is no materials transformation. Thus the relevant dimensions for our analysis are a) energy consumption and b) scrap rates.

Section 2. Life Cycle Inventory Data Collection Form (Adopted from Curran (2012))

Company name: ______________________________ Telephone: _________________
Contact name: ______________________________ E-mail: _________________
Facility location: ______________________________

**TIME COVERAGE** Month Year
Start __________ __________
End __________ __________

**COMPANY COVERAGE -** Percent of company output of this material covered by this facility __________
**INDUSTRY COVERAGE -** Percent of industry output of this material covered by this facility __________
**TECHNOLOGY REPRESENTED** (brief description)
__________________________________________________________________________________
__________________________________________________________________________________

**REPORTING BASIS** (basis on which all data in the form are reported; e.g, 1000 kg of output, specified number of product units, etc).
Product Output Basis (with units) _________________________________________________

**MATERIAL INPUTS TO PROCESS**
List all raw material inputs to the process, normalized to the product output basis specified above. Include incoming transport information (kilometers and mode: truck, rail, ship, etc.).

| **Material name** | **Amount** | **Units (kg.)** |
| --- | --- | --- |
|  |  |  |
|  |  |  |
|  |  |  |

*Add lines as needed*

| **Distance (km.)** | **Mode** | **Distance (km.)** | **Mode** |
| --- | --- | --- | --- |
|  |  |  |  |
|  |  |  |  |

*Add lines as needed*

**USEFUL OUTPUTS**

|  | **Name** | **Amount** | **Units (kg., etc.)** |
| --- | --- | --- | --- |
| **Primary product** |  |  |  |
| **Co-products** |  |  |  |
|  |  |  |  |
| **Recovered energy/heat** |  |  |  |
| **Recycled scrap** |  |  |  |

*Add lines as needed*
**WATER USAGE**

|  | **Name** | **Amount** | **Units (kg., etc.)** |
| --- | --- | --- | --- |
| **Process water** |  |  |  |
| Intake |  |  |  |
| Output |  |  |  |
| **Cooling water** |  |  |  |
| Intake |  |  |  |
| Output |  |  |  |

**ENERGY USE** (direct process energy and fuels used to produce process steam)

|  | **Amount** | **Units (kWh, gal, liters etc.)** |
| --- | --- | --- |
| **Electricity (grid)** |  |  |
| **Electricity (generated onsite)** |  |  |
| **Natural gas** |  |  |
| **Distillate oil** |  |  |
| **Residual oil** |  |  |
| **Coal** |  |  |

*Add lines as needed*

**SOLID WASTES**
Scrap that is recycled on or offsite should be reported in the USEFUL OUTPUTS section.

| **Type of waste** | **Amount** | **Units (kg.)** | **Disposition (landfill, burned, burned with energy recovery, etc.)** |
| --- | --- | --- | --- |
| Process wastes |  |  |  |
| Scrap not recycled |  |  |  |
| Wastes collected in emission control devices |  |  |  |
| Packaging wastes not recycled |  |  |  |

*Add lines as needed*

**EMISSIONS** – Report amount of each substance released to environment AFTER on-site emission controls or wastewater treatment.

**Emissions to Air**

|  |  |  | **Indicate emissions included** | |
| --- | --- | --- | --- | --- |
| **Name** | **Amount** | **Units (kg., etc.)** | **Process** | **Fuel Combustion** |
|  |  |  |  |  |
|  |  |  |  |  |

*Add lines as needed*

**Emissions to Water**

|  |  |  | **Indicate emissions included** | |  |
| --- | --- | --- | --- | --- | --- |
| **Name** | **Amount** | **Units (kg., etc.)** | **Process** | **Fuel Combustion** | **Receiving body of water (river, lake, etc.)** |
|  |  |  |  |  |  |
|  |  |  |  |  |  |

*Add lines as needed*
**PACKAGING FOR OUTGOING SHIPMENT**

|  | **Quantity** | **Units of products (items, kg., etc.)** |
| --- | --- | --- |
| **Product shipped in units of** |  |  |

List material used per shipping unit of product (corrugated boxes, plastic film, sleeves, etc.)

| **Packaging material** | **Amount** | **Units (kg., etc.)** |
| --- | --- | --- |
|  |  |  |
|  |  |  |

**DATA COLLECTION METHOD AND SOURCES**
For each flow, indicate (yes/no) in appropriate box that describes the data sources. Please provide additional descriptions as needed

|  | **Materials** | **Energy** | **Solid waste** | **Emissions** |
| --- | --- | --- | --- | --- |
| **Direct measurement** |  |  |  |  |
| **Company purchasing/ utility records** |  |  |  |  |
| **Calculated from equipment process** |  |  |  |  |
| **Engineering estimates** |  |  |  |  |
| **Permit limit** |  |  |  |  |
| **Other:** |  |  |  |  |

**Has extrapolation or allocation been used during data collection? If so, in what way?**
__________________________________________________________________________________
__________________________________________________________________________________
__________________________________________________________________________________
